# Supplementary material
Source: Research Square preprint supplement (doi:10.21203/rs.3.rs-8986027/v1)
Supplement: Supplementary file 1 [file 6dd8c80a3a5995e754df20ce.docx]

**Construction of a Self-Management Program for Patients with Urinary Calculi**

**Expert Consultation (First Round)**

Dear Expert,

Greetings! I am Min Liu from the Department of Urology, The Fifth Affiliated Hospital of Sun Yat-sen University. I am currently conducting a study on the construction of a self-management program for patients with urinary calculi. Based on a summary of evidence, we have preliminarily developed a "Self-Management Program for Patients with Urinary Calculi." We now plan to use the Delphi method to evaluate its importance and feasibility.

Given your profound academic expertise in this field, we sincerely invite you to serve as a consulting expert for this study and provide your guidance. This questionnaire consists of two parts: Part I is the item evaluation form for the program, and Part II is the expert background information form. We would be very grateful if you could reply within one week of receiving this questionnaire. Thank you for your guidance and support. Wishing you success in your work and happiness and health!

Contact: Min Liu
Email: pengheqi2022@163.com
Phone: 13926931195

**Part I: Item Evaluation Form for the "Self-Management Program for Patients with Urinary Calculi"**

**Instructions:**

1. Importance rating: 1 = not important, 2 = somewhat important, 3 = moderately important, 4 = important, 5 = very important.
2. Feasibility rating: 1 = not feasible, 2 = somewhat feasible, 3 = moderately feasible, 4 = feasible, 5 = very feasible.
3. Please judge the importance and feasibility of each item and mark "√" in the corresponding box.
4. If you believe the description of an item is inaccurate, please modify it in the "Item Modification Suggestions" column.
5. If you believe an item is unnecessary, please indicate "Suggest deletion" in the "Item Modification Suggestions" column.

6.If you think there are content items we have not considered, please add them in the "Item Modification Suggestions" column.

**Table 1. Themes and Corresponding Items of the Program**

| Item | Importance Rating | Feasibility Rating | Item Modification Suggestions |
| --- | --- | --- | --- |
| 1 Risk factor assessment | 🞎1 🞎2 🞎3 🞎4 🞎5 | 🞎1 🞎2 🞎3 🞎4 🞎5 |  |
| 1.1 Laboratory indicators | 🞎1 🞎2 🞎3 🞎4 🞎5 | 🞎1 🞎2 🞎3 🞎4 🞎5 |  |
| 1.1.1 Hypercalciuria: female urinary calcium excretion >250 mg/day (6.24 mmol/day), male >300 mg/day (7.49 mmol/day)[1] | 🞎1 🞎2 🞎3 🞎4 🞎5 | 🞎1 🞎2 🞎3 🞎4 🞎5 |  |
| 1.1.2 Hyperoxaluria: urinary oxalate excretion >25 mg/day[2] | 🞎1 🞎2 🞎3 🞎4 🞎5 | 🞎1 🞎2 🞎3 🞎4 🞎5 |  |
| 1.1.3 Hypocitraturia: citrate excretion <320 mg/day[1] | 🞎1 🞎2 🞎3 🞎4 🞎5 | 🞎1 🞎2 🞎3 🞎4 🞎5 |  |
| 1.1.4 Hyperuricosuria: 24-hour urinary uric acid excretion >750 mg (4.5 mmol) in women or >800 mg (4.8 mmol) in men[1] | 🞎1 🞎2 🞎3 🞎4 🞎5 | 🞎1 🞎2 🞎3 🞎4 🞎5 |  |
| 1.1.5 Low urine volume: <2.5 L/day[3] | 🞎1 🞎2 🞎3 🞎4 🞎5 | 🞎1 🞎2 🞎3 🞎4 🞎5 |  |
| 1.1.6 Urine pH: pH <5.5 or >6.5[1] | 🞎1 🞎2 🞎3 🞎4 🞎5 | 🞎1 🞎2 🞎3 🞎4 🞎5 |  |
| 1.2 Diet | 🞎1 🞎2 🞎3 🞎4 🞎5 | 🞎1 🞎2 🞎3 🞎4 🞎5 |  |
| 1.2.1 Low fluid intake, consumption of sugary drinks, tea, or alcohol[1,4,5] | 🞎1 🞎2 🞎3 🞎4 🞎5 | 🞎1 🞎2 🞎3 🞎4 🞎5 |  |
| 1.2.2 High oxalate intake[6] | 🞎1 🞎2 🞎3 🞎4 🞎5 | 🞎1 🞎2 🞎3 🞎4 🞎5 |  |
| 1.2.3 High sodium intake[7] | 🞎1 🞎2 🞎3 🞎4 🞎5 | 🞎1 🞎2 🞎3 🞎4 🞎5 |  |
| 1.2.4 High intake of non-dairy animal protein[8] | 🞎1 🞎2 🞎3 🞎4 🞎5 | 🞎1 🞎2 🞎3 🞎4 🞎5 |  |
| 1.2.5 High sucrose/fructose intake[9,10] | 🞎1 🞎2 🞎3 🞎4 🞎5 | 🞎1 🞎2 🞎3 🞎4 🞎5 |  |
| 1.2.6 High vitamin C intake[11] | 🞎1 🞎2 🞎3 🞎4 🞎5 | 🞎1 🞎2 🞎3 🞎4 🞎5 |  |
| 1.3 Family history | 🞎1 🞎2 🞎3 🞎4 🞎5 | 🞎1 🞎2 🞎3 🞎4 🞎5 |  |
| 1.3.1 Family history of urinary calculi[12,13] | 🞎1 🞎2 🞎3 🞎4 🞎5 | 🞎1 🞎2 🞎3 🞎4 🞎5 |  |
| 1.4 Underlying diseases | 🞎1 🞎2 🞎3 🞎4 🞎5 | 🞎1 🞎2 🞎3 🞎4 🞎5 |  |
| 1.4.1 Presence of primary hyperparathyroidism, hypertension, gout, diabetes, obesity, medullary sponge kidney, distal (type 1) renal tubular acidosis, inflammatory bowel disease, short bowel syndrome, bowel resection or gastrointestinal bypass surgery, urinary tract infection, cystinuria[14-21] | 🞎1 🞎2 🞎3 🞎4 🞎5 | 🞎1 🞎2 🞎3 🞎4 🞎5 |  |
| 1.5 Medication history | 🞎1 🞎2 🞎3 🞎4 🞎5 | 🞎1 🞎2 🞎3 🞎4 🞎5 |  |
| 1.5.1 Use of carbonic anhydrase inhibitors, long-term glucocorticoids, loop diuretics, laxatives[1] | 🞎1 🞎2 🞎3 🞎4 🞎5 | 🞎1 🞎2 🞎3 🞎4 🞎5 |  |
| 1.5.2 Calcium supplementation in elderly women[22,23] | 🞎1 🞎2 🞎3 🞎4 🞎5 | 🞎1 🞎2 🞎3 🞎4 🞎5 |  |
| 1.6 Environment | 🞎1 🞎2 🞎3 🞎4 🞎5 | 🞎1 🞎2 🞎3 🞎4 🞎5 |  |
| 1.6.1 Summer season[24,25] | 🞎1 🞎2 🞎3 🞎4 🞎5 | 🞎1 🞎2 🞎3 🞎4 🞎5 |  |
| 1.6.2 High-temperature environment[26-28]。 | 🞎1 🞎2 🞎3 🞎4 🞎5 | 🞎1 🞎2 🞎3 🞎4 🞎5 |  |
| 1.7 Occupation | 🞎1 🞎2 🞎3 🞎4 🞎5 | 🞎1 🞎2 🞎3 🞎4 🞎5 |  |
| 1.7.1 Operating room physicians, pilots, police officers, teachers, drivers, occupations exposed to high temperatures such as construction workers[5,24,25,29]。 | 🞎1 🞎2 🞎3 🞎4 🞎5 | 🞎1 🞎2 🞎3 🞎4 🞎5 |  |
| 2 Self-management measures | 🞎1 🞎2 🞎3 🞎4 🞎5 | 🞎1 🞎2 🞎3 🞎4 🞎5 |  |
| 2.1 Universal measures | 🞎1 🞎2 🞎3 🞎4 🞎5 | 🞎1 🞎2 🞎3 🞎4 🞎5 |  |
| 2.1.1 Specific dietary assessment and recommendations conducted with the participation of a registered dietitian[30] | 🞎1 🞎2 🞎3 🞎4 🞎5 | 🞎1 🞎2 🞎3 🞎4 🞎5 |  |
| 2.1.2 Fluid management | 🞎1 🞎2 🞎3 🞎4 🞎5 | 🞎1 🞎2 🞎3 🞎4 🞎5 |  |
| 2.1.2.1 Water is the preferred fluid[31] | 🞎1 🞎2 🞎3 🞎4 🞎5 | 🞎1 🞎2 🞎3 🞎4 🞎5 |  |
| 2.1.2.2 Daily fluid intake of 2.5–3 L[32] | 🞎1 🞎2 🞎3 🞎4 🞎5 | 🞎1 🞎2 🞎3 🞎4 🞎5 |  |
| 2.1.2.3 Fresh lemon juice can be added to drinking water[33] | 🞎1 🞎2 🞎3 🞎4 🞎5 | 🞎1 🞎2 🞎3 🞎4 🞎5 |  |
| 2.1.2.4 Avoid carbonated beverages, alcohol, and soft drinks[33] | 🞎1 🞎2 🞎3 🞎4 🞎5 | 🞎1 🞎2 🞎3 🞎4 🞎5 |  |
| 2.1.2.5 Maintain daily urine output above 2 L, ensuring urine is clear or slightly yellow[32] | 🞎1 🞎2 🞎3 🞎4 🞎5 | 🞎1 🞎2 🞎3 🞎4 🞎5 |  |
| 2.1.3 Dietary management | 🞎1 🞎2 🞎3 🞎4 🞎5 | 🞎1 🞎2 🞎3 🞎4 🞎5 |  |
| 2.1.3.1 Sodium intake ≤6 g/day, reduce hidden salt intake from pickled, preserved, and candied foods[32,33] | 🞎1 🞎2 🞎3 🞎4 🞎5 | 🞎1 🞎2 🞎3 🞎4 🞎5 |  |
| 2.1.3.2 Calcium intake 1–1.2 g/day; if calcium supplementation is needed, take with meals[30,34] | 🞎1 🞎2 🞎3 🞎4 🞎5 | 🞎1 🞎2 🞎3 🞎4 🞎5 |  |
| 2.1.3.3 Animal protein intake 0.8–1.0 g/kg/day; recommended daily intake of milk 300 g, soy products 50 g; probiotic-rich yogurt can be chosen[32,35,36] | 🞎1 🞎2 🞎3 🞎4 🞎5 | 🞎1 🞎2 🞎3 🞎4 🞎5 |  |
| 2.1.3.4 Increase intake of fruits and vegetables; recommended daily intake of vegetables 300–500 g, fruits 200–300 g; increase consumption of tubers and whole grains[32,34] | 🞎1 🞎2 🞎3 🞎4 🞎5 | 🞎1 🞎2 🞎3 🞎4 🞎5 |  |
| 2.1.3.5 Limit or avoid excessive intake of oxalate-rich products[37] | 🞎1 🞎2 🞎3 🞎4 🞎5 | 🞎1 🞎2 🞎3 🞎4 🞎5 |  |
| 2.1.3.6 Reduce intake of fried foods, fatty meats, and other high-fat foods; control cooking oil; use vegetable oils rich in unsaturated fatty acids[32] | 🞎1 🞎2 🞎3 🞎4 🞎5 | 🞎1 🞎2 🞎3 🞎4 🞎5 |  |
| 2.1.3.7 Limit intake of processed meats and animal organs[32] | 🞎1 🞎2 🞎3 🞎4 🞎5 | 🞎1 🞎2 🞎3 🞎4 🞎5 |  |
| 2.1.3.8 Ensure a balanced diet and avoid picky eating[34] | 🞎1 🞎2 🞎3 🞎4 🞎5 | 🞎1 🞎2 🞎3 🞎4 🞎5 |  |
| 2.1.4 Lifestyle management | 🞎1 🞎2 🞎3 🞎4 🞎5 | 🞎1 🞎2 🞎3 🞎4 🞎5 |  |
| 2.1.4.1 Maintain a healthy lifestyle, achieve and maintain a healthy body mass index (BMI)[31,34] | 🞎1 🞎2 🞎3 🞎4 🞎5 | 🞎1 🞎2 🞎3 🞎4 🞎5 |  |
| 2.1.4.2 Increase physical activity: daily activity equivalent to 6000 steps, or moderate-intensity physical activity more than 5 times per week, each session ≥30 minutes. The criterion for moderate-intensity activity is that one can still talk but cannot sing. Moderate-intensity activities include: brisk walking, water aerobics, cycling, dancing, doubles tennis, pushing a lawn mower, hiking, roller skating[32,33] | 🞎1 🞎2 🞎3 🞎4 🞎5 | 🞎1 🞎2 🞎3 🞎4 🞎5 |  |
| 2.1.4.3 Reduce time spent watching TV and using mobile phones[33] | 🞎1 🞎2 🞎3 🞎4 🞎5 | 🞎1 🞎2 🞎3 🞎4 🞎5 |  |
| 2.2 Specific self-management measures for patients with particular stone types | 🞎1 🞎2 🞎3 🞎4 🞎5 | 🞎1 🞎2 🞎3 🞎4 🞎5 |  |
| 2.2.1 Calcium oxalate stones | 🞎1 🞎2 🞎3 🞎4 🞎5 | 🞎1 🞎2 🞎3 🞎4 🞎5 |  |
| 2.2.1.1 Adequate calcium intake: 800–1000 mg/day. Do not restrict milk and dairy products, yogurt, etc.; recommended to obtain adequate calcium through dairy products[31,32] | 🞎1 🞎2 🞎3 🞎4 🞎5 | 🞎1 🞎2 🞎3 🞎4 🞎5 |  |
| 2.2.1.2 Restrict sodium intake: <2400 mg/day; daily salt intake <5 g[31,32] | 🞎1 🞎2 🞎3 🞎4 🞎5 | 🞎1 🞎2 🞎3 🞎4 🞎5 |  |
| 2.2.1.3 Limit dietary oxalate intake, e.g., spinach, asparagus, strong tea, coffee, cocoa, etc.[32] | 🞎1 🞎2 🞎3 🞎4 🞎5 | 🞎1 🞎2 🞎3 🞎4 🞎5 |  |
| 2.2.1.4 Limit excessive fat intake, especially animal fat; limit intake of foods rich in cholesterol and trans fatty acids[32] | 🞎1 🞎2 🞎3 🞎4 🞎5 | 🞎1 🞎2 🞎3 🞎4 🞎5 |  |
| 2.2.1.5 Adequate protein intake: 0.8–1.0 g/kg/day; reduce non-dairy animal protein, increase plant-based protein such as soy protein[32] | 🞎1 🞎2 🞎3 🞎4 🞎5 | 🞎1 🞎2 🞎3 🞎4 🞎5 |  |
| 2.2.1.6 Increase intake of vegetables and fruits to increase citrate intake. Fruits rich in citrate are mainly citrus fruits such as oranges, tangerines, grapefruits[32] | 🞎1 🞎2 🞎3 🞎4 🞎5 | 🞎1 🞎2 🞎3 🞎4 🞎5 |  |
| 2.2.1.7 Avoid long-term high-dose vitamin C (vitamin C intake >1 g/day) and calcium supplements (calcium supplements >1 g/day). Vitamin C supplementation should not exceed 500 mg/day; appropriate dose is 200 mg/day[32] | 🞎1 🞎2 🞎3 🞎4 🞎5 | 🞎1 🞎2 🞎3 🞎4 🞎5 |  |
| 2.2.1.8 Vitamin B6 intake of 250–500 mg/day can reduce urinary oxalate excretion[32] | 🞎1 🞎2 🞎3 🞎4 🞎5 | 🞎1 🞎2 🞎3 🞎4 🞎5 |  |
| 2.2.1.9 Moderate consumption of vinegar as a dietary habit may reduce the risk of calcium oxalate stones[32] | 🞎1 🞎2 🞎3 🞎4 🞎5 | 🞎1 🞎2 🞎3 🞎4 🞎5 |  |
| 2.2.2 Uric acid stones | 🞎1 🞎2 🞎3 🞎4 🞎5 | 🞎1 🞎2 🞎3 🞎4 🞎5 |  |
| 2.2.2.1 Oral sodium bicarbonate to alkalize urine, maintain urine pH between 6.5 and 6.8. Potassium sodium hydrogen citrate can be taken orally to promote stone dissolution and expulsion[32] | 🞎1 🞎2 🞎3 🞎4 🞎5 | 🞎1 🞎2 🞎3 🞎4 🞎5 |  |
| 2.2.2.2 Low-purine diet to reduce uric acid formation; patients with hyperuricemia may take allopurinol and folic acid[32] | 🞎1 🞎2 🞎3 🞎4 🞎5 | 🞎1 🞎2 🞎3 🞎4 🞎5 |  |
| 2.2.2.3 Increase intake of fruits and juices rich in citrate: citrus fruits (lemons, oranges, tangerines, grapefruits), orange juice, lemon juice, grape juice, lime juice, etc.[32] | 🞎1 🞎2 🞎3 🞎4 🞎5 | 🞎1 🞎2 🞎3 🞎4 🞎5 |  |
| 2.2.2.4 Restrict protein intake: 0.8–1.0 g/kg/day; choose plant protein over animal protein[32] | 🞎1 🞎2 🞎3 🞎4 🞎5 | 🞎1 🞎2 🞎3 🞎4 🞎5 |  |
| 2.2.3 Cystine stones | 🞎1 🞎2 🞎3 🞎4 🞎5 | 🞎1 🞎2 🞎3 🞎4 🞎5 |  |
| 2.2.3.1 Increase fluid intake to maintain urine output at 2000–3000 mL/day. Keep urinary cystine concentration below 200 mg/L[32] | 🞎1 🞎2 🞎3 🞎4 🞎5 | 🞎1 🞎2 🞎3 🞎4 🞎5 |  |
| 2.2.3.2 Reduce protein: 0.8–1.0 g/kg/day. Limit animal protein, increase plant protein. After limiting animal protein, be aware of vitamin deficiencies and supplementation, especially vitamin B12[32] | 🞎1 🞎2 🞎3 🞎4 🞎5 | 🞎1 🞎2 🞎3 🞎4 🞎5 |  |
| 2.2.3.3 Avoid excessive intake of methionine-rich foods such as soybeans, fish, mushrooms[32]。 | 🞎1 🞎2 🞎3 🞎4 🞎5 | 🞎1 🞎2 🞎3 🞎4 🞎5 |  |
| 2.2.3.4 Restrict sodium intake: <2000 mg/day, equivalent to 5 g of salt per day[32] | 🞎1 🞎2 🞎3 🞎4 🞎5 | 🞎1 🞎2 🞎3 🞎4 🞎5 |  |
| 2.2.3.5 Alkalize urine, maintain urine pH above 6.5[32] | 🞎1 🞎2 🞎3 🞎4 🞎5 | 🞎1 🞎2 🞎3 🞎4 🞎5 |  |
| 参考文献：   1. Curhan G C. Kidney stones in adults: Epidemiology and risk factors[M/OL]. In: UpToDate, Preminger G M, ed. UpToDate Publishing, 2024. [2025-12-11]. [https://www.uptodate.com/contents/kidney-stones-in-adults-epidemiology-and-risk-factors](https://www.uptodate.com/contents/kidney-stones-in-adults-epidemiology-and-risk-factors" \t "/Users/279363860qq.com/Documents\\x/_blank). 2. Curhan G C, Taylor E N. 24-h uric acid excretion and the risk of kidney stones[J]. Kidney Int, 2008, 73(4):489-496. 3. Pearle M S, et al. Medical management of kidney stones: AUA guideline[J]. J Urol, 2014, 192(2):316-324. 4. Ferraro P M, et al. Soda and other beverages and the risk of kidney stones[J]. Clin J Am Soc Nephrol, 2013, 8(8):1389-1395. 5. Zeng G, et al. International Alliance of Urolithiasis (IAU) guidelines on the metabolic evaluation and medical management of urolithiasis[J]. Urolithiasis, 2022, 51(1):4. 6. Lieske J C, et al. Diet, but not oral probiotics, effectively reduces urinary oxalate excretion and calcium oxalate supersaturation[J]. Kidney Int, 2010, 78(11):1178-1186. 7. Sorensen M D, et al. Impact of nutritional factors on incident kidney stone formation: a report from the WHI OS[J]. J Urol, 2012, 187(5):1645-1650. 8. Ferraro P M, et al. Dietary Protein and Potassium, Diet-Dependent Net Acid Load, and Risk of Incident Kidney Stones[J]. Clin J Am Soc Nephrol, 2016, 11(10):1834-1844. 9. Curhan G C, et al. Dietary factors and the risk of incident kidney stones in younger women: Nurses' Health Study II[J]. Arch Intern Med, 2004, 164(8):885-891. 10. Taylor E N, Curhan G C. Fructose consumption and the risk of kidney stones[J]. Kidney Int, 2008, 73(2):207-212. 11. Urivetzky M, Kessaris D, Smith A D. Ascorbic acid overdosing: a risk factor for calcium oxalate nephrolithiasis[J]. J Urol, 1992, 147(5):1215-1218. 12. Curhan G C, et al. Family history and risk of kidney stones[J]. J Am Soc Nephrol, 1997, 8(10):1568-1573. 13. Serio A, Fraioli A. Epidemiology of nephrolithiasis[J]. Nephron, 1999, 81(Suppl 1):26-30. 14. Ando R, et al. Kidney stone formation is positively associated with conventional risk factors for coronary heart disease in Japanese men[J]. J Urol, 2013, 189(4):1340-1346. 15. Kramer H J, et al. The association between gout and nephrolithiasis in men: The Health Professionals' Follow-Up Study[J]. Kidney Int, 2003, 64(3):1022-1026. 16. Kramer H M, Curhan G. The association between gout and nephrolithiasis: the National Health and Nutrition Examination Survey III, 1988-1994[J]. Am J Kidney Dis, 2002, 40(1):37-42. 17. Curhan G C, et al. Body size and risk of kidney stones[J]. J Am Soc Nephrol, 1998, 9(9):1645-1652. 18. Taylor E N, Stampfer M J, Curhan G C. Obesity, weight gain, and the risk of kidney stones[J]. JAMA, 2005, 293(4):455-462. 19. Taylor E N, Stampfer M J, Curhan G C. Diabetes mellitus and the risk of nephrolithiasis[J]. Kidney Int, 2005, 68(3):1230-1235. 20. Daudon M, Lacour B, Jungers P. Influence of body size on urinary stone composition in men and women[J]. Urol Res, 2006, 34(3):193-199. 21. Sarica K, Altay B, Erturhan S. Effect of being overweight on stone-forming risk factors[J]. Urology, 2008, 71(5):771-774. 22. Jackson R D, et al. Calcium plus vitamin D supplementation and the risk of fractures[J]. N Engl J Med, 2006, 354(7):669-683. 23. Curhan G C, et al. Dietary factors and the risk of incident kidney stones in younger women: Nurses' Health Study II[J]. Arch Intern Med, 2004, 164(8):885-891. 24. Sorokin I, et al. Epidemiology of stone disease across the world[J]. World J Urol, 2017, 35(9):1301-1320. 25. Geraghty R M, et al. Worldwide impact of warmer seasons on the incidence of renal colic and kidney stone disease: evidence from a systematic review of literature[J]. J Endourol, 2017, 31(8):729-735. 26. Semins M J, et al. The effect of restrictive bariatric surgery on urinary stone risk factors[J]. Urology, 2010, 76(4):826-829. 27. Brikowski T H, Lotan Y, Pearle M S. Climate-related increase in the prevalence of urolithiasis in the United States[J]. Proc Natl Acad Sci USA, 2008, 105(28):9841-9846. 28. Soucie J M, et al. Relation between geographic variability in kidney stones prevalence and risk factors for stones[J]. Am J Epidemiol, 1996, 143(5):487-495. 29. Atan L, et al. High kidney stone risk in men working in steel industry at hot temperatures[J]. Urology, 2005, 65(5):858-861. 30. Bhojani N, et al. UPDATE - Canadian Urological Association guideline: Evaluation and medical management of kidney stones[J]. Can Urol Assoc J, 2022, 16(6):175-188. 31. Curhan G C. Kidney stones in adults: Prevention of recurrent kidney stones[M/OL]. In: UpToDate, Preminger G M, ed. UpToDate Publishing, 2024. [2025-12-11]. [https://www.uptodate.com/contents/kidney-stones-in-adults-prevention-of-recurrent-kidney-stones](https://www.uptodate.com/contents/kidney-stones-in-adults-prevention-of-recurrent-kidney-stones" \t "/Users/279363860qq.com/Documents\\x/_blank). 32. Cao J R, Qiu J H. Expert consensus on nutritional management of urolithiasis by the International Alliance of Urolithiasis[J]. J Clin Urol, 2024, 39(4):271-275. (in Chinese) 33. National Institute for Health and Care Excellence. Renal and ureteric stones: assessment and management[EB/OL]. (2019-01)[2025-12-11]. [https://www.nice.org.uk/guidance/ng118](https://www.nice.org.uk/guidance/ng118" \t "/Users/279363860qq.com/Documents\\x/_blank). 34. Skolarikos A, et al. Urolithiasis[M]//EAU Guidelines. Arnhem, The Netherlands: EAU Guidelines Office, 2022. 35. Fink H A, et al. Diet, fluid, or supplements for secondary prevention of nephrolithiasis: a systematic review and meta-analysis of randomized trials[J]. Eur Urol, 2009, 56(1):72-80. 36. Borghi L, et al. Comparison of two diets for the prevention of recurrent stones in idiopathic hypercalciuria[J]. N Engl J Med, 2002, 346(2):77-84. 37. Asplin J R. The management of patients with enteric hyperoxaluria[J]. Urolithiasis, 2016, 44(1):33-43. | | | |

**Part II: Expert Background Information Form**

**Instructions:**

1. Please fill in Table 2 according to your own situation.
2. Please fill in Table 3, selecting the basis for your judgment regarding the consultation content, and mark "√" in the appropriate column.
3. Please fill in Table 4, selecting your familiarity with the consultation content, and mark "√" in the appropriate column.

Table 2. Expert Basic Information

| Name |  | Age |  |
| --- | --- | --- | --- |
| Education |  | Work Unit |  |
| Total Years of Work |  | Years of Work in Urology |  |
| Professional Title |  | Position |  |

Table 3. Basis for Judgment (Please mark "√")

| Basis for Judgment | Degree of Influence (Self-evaluation) | | |
| --- | --- | --- | --- |
| Large | Medium | Small |
| Practical experience |  |  |  |
| Theoretical knowledge |  |  |  |
| Reference to domestic and international literature |  |  |  |
| Subjective judgment |  |  |  |

Table 4. Familiarity with the Consultation Content (Please mark "√")

| Familiarity | Very familiar | Relatively familiar | Generally familiar | Not very familiar | Unfamiliar |
| --- | --- | --- | --- | --- | --- |
| Self-rating |  |  |  |  |  |

Thank you again for your hard work and guidance! If you have any other comments or suggestions, please write them in the box below.

|  |
| --- |
